# Supplementary material for: Uptake and barriers to the use of geospatial technologies in forest management
Source: Springer Nature journal article supplement (doi:10.1186/1179-5395-43-16), 2013-01-01

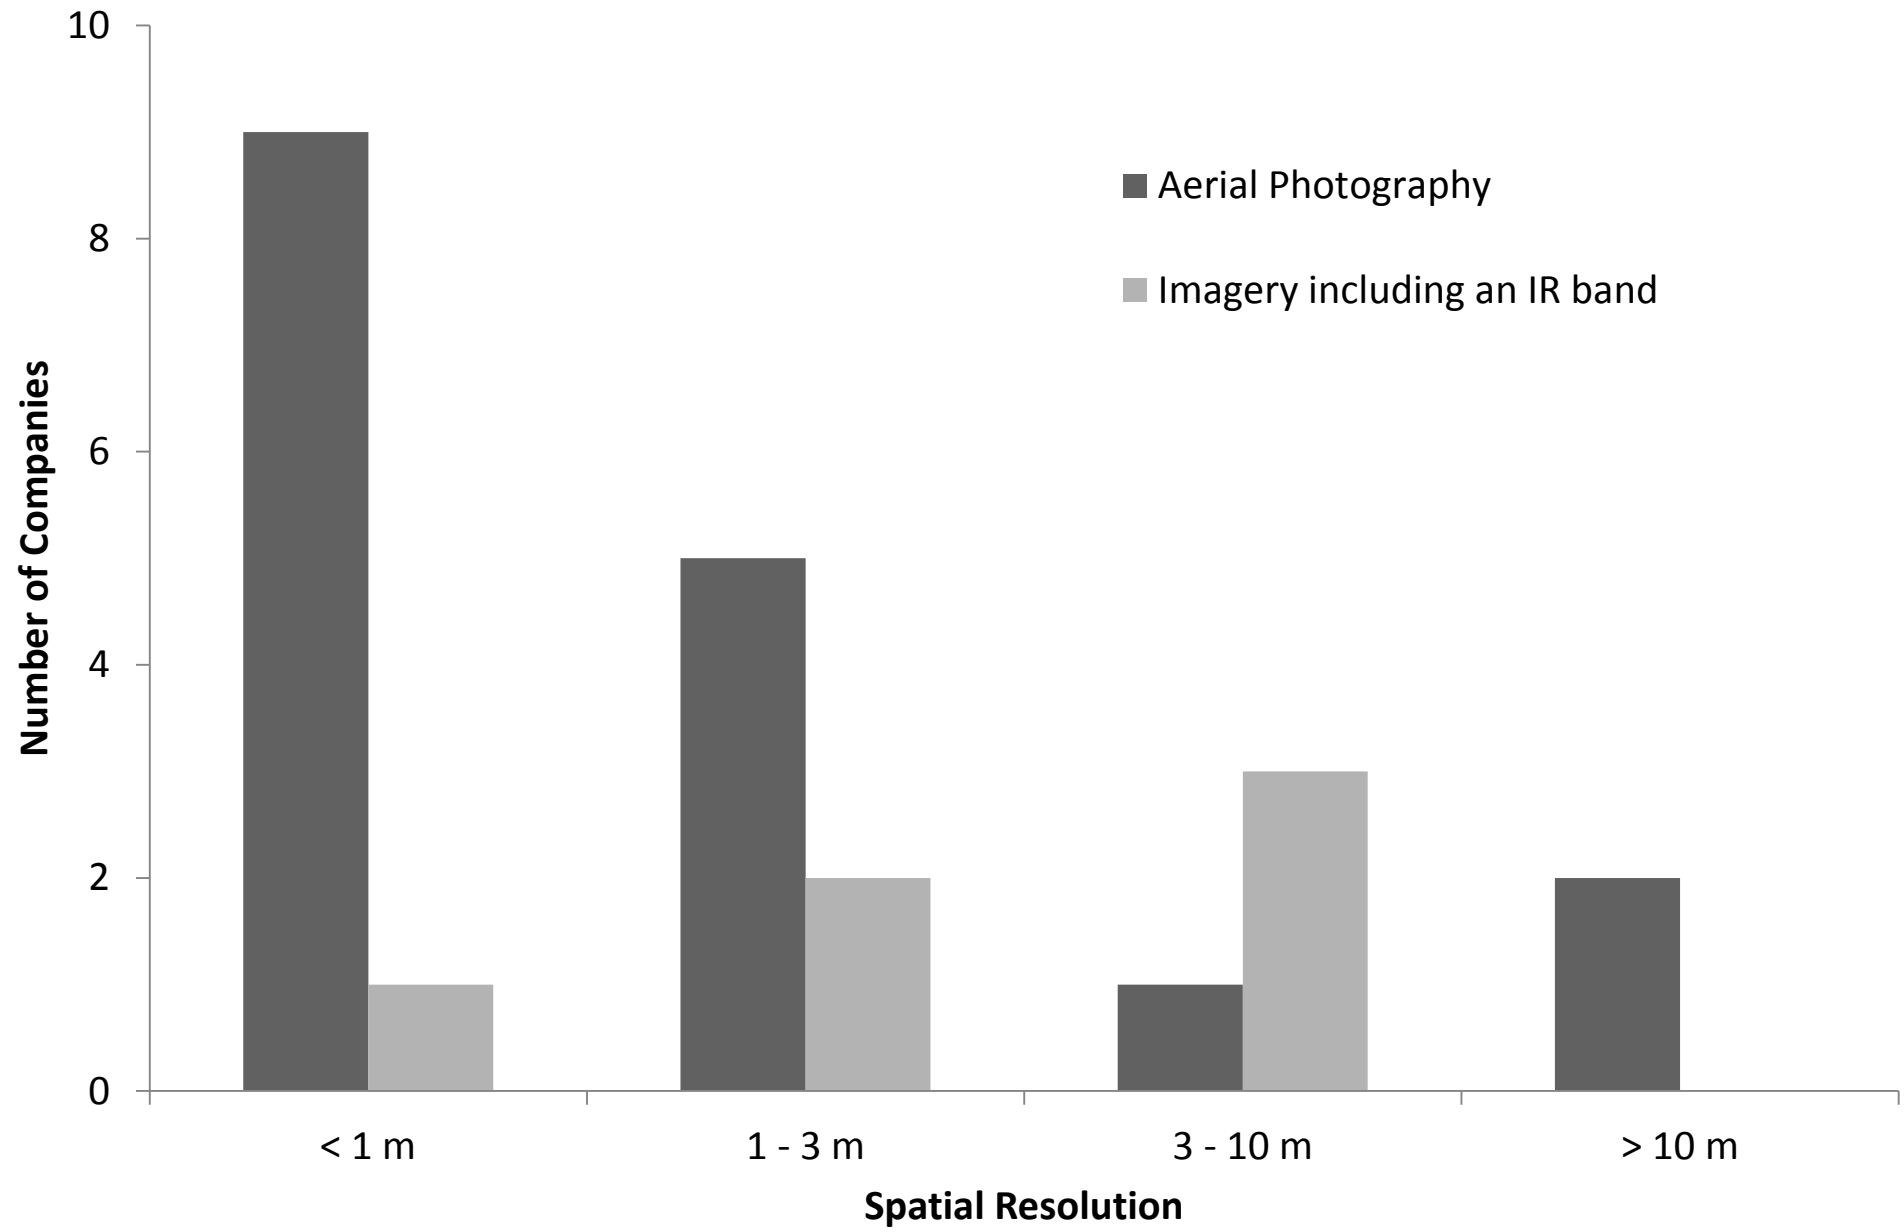

Supplement: 40490_2013_10_MOESM2_ESM.pdf [file 40490_2013_10_MOESM2_ESM.pdf]
